1 **Exogenous application of non-mature miRNA-encoded miPEP164c inhibits**  
2 **proanthocyanidin synthesis and stimulates anthocyanin accumulation in grape berry cells**

3

4 Mariana Vale<sup>1</sup>, Jéssica Rodrigues<sup>1</sup>, Hélder Badim<sup>1,2</sup>, Hernâni Gerós<sup>1,2</sup>, Artur Conde<sup>1,2\*</sup>

5

6 <sup>1</sup>Centre of Molecular and Environmental Biology (CBMA) Department of Biology, University of Minho, 4710-  
7 057 Braga, Portugal.

8 <sup>2</sup>Centre for the Research and Technology of Agro-Environmental and Biological Sciences (CITAB),  
9 University of Trás-os-Montes e Alto Douro, Vila Real, Portugal.

10

11 \*Correspondence: Artur Conde; [arturconde@bio.uminho.pt](mailto:arturconde@bio.uminho.pt)

12

13 **List of author contributions:**

14 M.V. performed the experiments and wrote the manuscript. J.R performed the experiments. H.B.  
15 performed the experiments. H.G. advised, wrote and reviewed the manuscript. A.C. conceptualized  
16 the work, performed the experiments, and wrote and reviewed the manuscript.

17

18 **Funding:**

19 The work was supported by Fundação para a Ciência e Tecnologia (FCT), under the strategic  
20 programmes UID/AGR/04033/2020 and UID/BIA/04050/2020. The work was also supported by  
21 FCT and European Funds (FEDER/POCI/COMPETE2020) through the research project  
22 “MitiVineDrought—Combining “omics” with molecular, biochemical, and physiological analyses as  
23 an integrated effort to validate novel and easy-to-implement drought mitigation strategies in  
24 grapevine while reducing water use” with ref. PTDC/BIA-FBT/30341/2017 and ref. POCI-01-0145-  
25 FEDER-030341, respectively; through the research project “BerryPlastid—Biosynthesis of  
26 secondary compounds in the grape berry: unlocking the role of the plastid” with ref. POCI-01-0145-  
27 FEDER-028165 and ref. PTDC/BIA-FBT/28165/2017, respectively; and also through the FCT-  
28 funded research project “GrapeInfectomics” (PTDC/ASPHOR/28485/2017). Artur Conde was  
29 supported with a post-doctoral researcher contract/position within the project “MitiVineDrought”  
30 (PTDC/BIA-FBT/30341/2017 and POCI-01-0145-FEDER-030341). Mariana Vale was supported by  
31 a PhD fellowship funded by FCT (SFRH/BD/144637/2019). Hélder Badim was supported by a PhD  
32 fellowship funded by FCT (SFRH/BD/144638/2019). This work also benefited from the networking

33 activities within the European Union-funded COST Action CA17111 “INTEGRAPE—Data  
34 Integration to maximize the power of omics for grapevine improvement”.

35

36

### 37 **Abstract**

38 Secondary metabolic pathways in grape berries are tightly regulated by an array of molecular  
39 mechanisms, including microRNA-mediated post-transcriptional regulation. As recently discovered,  
40 before being processed into mature miRNAs, the primary transcripts of miRNAs (pri-miRNAs) can  
41 encode for small miRNA-encoded peptides (micropeptides - miPEPs) that ultimately led to an  
42 accentuated downregulation of the respective miRNA-targeted genes. Although few studies about  
43 miPEPs are available, the discovery of miPEPs reveals a new layer of gene regulation at the post-  
44 transcriptional level and may present a key advantage in agronomy.

45 Here, we identified a miPEP encoded in non-mature miR164c putatively targeting grapevine’s  
46 transcription factor VvMYBPA1 (miPEP164c/miPEP-MYBPA1), a positive regulator of key genes  
47 in the proanthocyanidin-biosynthetic pathway, one that competes directly for substrate with the  
48 anthocyanin-biosynthetic pathway.

49 Thus, the objective of this work was to test the hypothesis that the exogenous application of  
50 miPEP164c (miPEP-MYBPA1) can modulate the secondary metabolism of grape berry cells by  
51 inhibiting PA biosynthetic pathway while simultaneously stimulating anthocyanin synthesis.

52 The exogenous application of miPEP164c to suspension-cultured cells from grape berry (cv.  
53 Gamay) enhanced the transcription of its corresponding pri-miR164c, thus leading to a more  
54 pronounced post-transcriptional silencing of its target VvMYBPA1. This led to a significant inhibition  
55 of the proanthocyanidin pathway, mostly via inhibition of *leucoanthocyanidin reductase* and  
56 *anthocyanidin reductase* enzymatic activities and VvLAR1 downregulation. In parallel, the  
57 anthocyanin-biosynthetic route was stimulated. Anthocyanin content was 31 % higher in  
58 miPEP164c-treated cells, in agreement with the higher activity of VvUFGT and the corresponding  
59 VvUFGT1 transcripts.

## 60 Introduction

61 Although grapevines are well adapted to semi-arid climate, the increasingly more frequent  
62 combined effect of drought, high air temperature and high evaporative demand has a negative  
63 impact in grapevine yield (Chaves et al., 2010) and, if severe, also in berry quality (Teixeira et al.,  
64 2013). Therefore, berry and wine quality depend strongly on the grapevine adaptability to drought,  
65 heat and light/UV intensity. This abiotic stressors particularly impact highly-regulated molecular  
66 mechanisms underlying the synthesis of several quality-related compounds, such as anthocyanins,  
67 proanthocyanidins (PAs), flavanols and flavonols (Downey et al., 2006; Teixeira et al., 2013).

68 Besides being the key component in red wine color, anthocyanins have several health-  
69 related properties such as anti-inflammatory and antioxidant capacity, protecting DNA mainly of  
70 damage induced by free radicals or reactive oxygen species due to photo-oxidative stress (Gould,  
71 2004). Anthocyanin and proanthocyanidin (condensed tannins) biosynthetic pathways share two  
72 common precursors, leucoanthocyanidins and anthocyanidins, and as a result they are in constant  
73 competition for carbon availability (Li et al., 2016). Proanthocyanidins are composed of several  
74 monomers of catechin and epicatechin, both flavan-3-ols that originate in a branch deviation of the  
75 general flavonoid pathway. Catechin synthesis is catalyzed by *leucoanthocyanidin reductase*  
76 (LAR), an enzyme that uses leucoanthocyanidins as substrate. However, leucoanthocyanidins can  
77 also be catalyzed by *leucoanthocyanidin oxygenase* (LDOX), continuing the flavonoid pathway and  
78 resulting in the formation of anthocyanidins, a substrate of both *UDP-glucose flavonoid 3-O-*  
79 *glucosyltransferase* (UGT), in the synthesis of anthocyanins, and *anthocyanidin reductase* (ANR),  
80 in the synthesis of epicatechin, another building block of proanthocyanidins (Gagné, Lacampagne,  
81 Claisse, & Gény, 2009). In grapevine, many transcription factors belonging to the R2R3-MYB family  
82 are involved in the regulation of flavonoid synthesis by inducing or silencing key biosynthetic genes  
83 along the flavonoid pathway (Matus et al., 2009) (Deluc, 2006). The transcription factors VvMYB5a  
84 and VvMYB5b are already described as positive regulators of the flavonoid pathway, inducing an  
85 upregulation of late-stage berry-associated genes such as *VvCHI* (chalcone isomerase), *VvF3'5'*  
86 (flavonoid 3',5'-hydroxylase), *VvDFR* (dihydroflavonol 4-reductase), *VvLDOX*, *VvANR* and *VvLAR1*  
87 leading to the synthesis of flavonols, anthocyanidins and proanthocyanidins (Pérez-Díaz et al.,  
88 2016) (Cavallini et al., 2014). *VvMYBPA1*, expressed during flowering and early berry development,  
89 is a positive regulator of proanthocyanidin (PA) synthesis, by upregulating *VvLDOX*, *VvANR* and  
90 *VvLAR1* genes (Cavallini et al., 2015) (Bogs et al., 2007), thus limiting the progress of the  
91 anthocyanin-biosynthetic route.

92 Regulation of the flavonoid pathway can also be coordinated at the post-transcriptional  
93 level by several microRNAs (miRNAs) (Xie et al., 2010) that negatively regulate the expression of  
94 their target genes, either by promoting degradation of such target messenger RNAs (mRNAs) or  
95 by leading to inhibition of targeted mRNA translation (Pantaleo et al., 2010). MicroRNAs are initially  
96 transcribed as much larger primary transcripts (pri-miRNAs) and only become mature miRNA after  
97 a maturation processes occurs in the cytosol (Xie et al., 2010). Like any other protein-coding gene,  
98 miRNAs genes are transcribed by RNA polymerase II originating the primary transcript of miRNA  
99 (pri-miRNA) that consists of a few hundred bases, a 5'cap and 3'poly-A tail and the characteristic  
100 stem-loop structure where the miRNA sequence is inserted, and which is recognized by members  
101 of the Dicer-like1 family enzymes. This enzyme cleaves the 5'cap and 3' poly-A tail of the primary  
102 transcript, transforming it in a precursor miRNA (pre-miRNA). DCL1 also carries out the subsequent  
103 cleavage of pre-miRNA to release the miRNA:miRNA\* duplex which is then translocated to the  
104 nucleus by HASTY transporter where the correct miRNA strand is incorporated in a ribonuclear  
105 particle to form the RISC complex, the machinery that mediates miRNA-mediated gene silencing  
106 (Budak & Akpinar, 2015).

107 In a groundbreaking finding, it was discovered that, before being processed into mature  
108 miRNAs, some pri-miRNAs contain small open reading frames (ORF) that could encode for small  
109 regulatory peptides called miRNA-encoded peptides (miPEPs) (Lauressergues et al., 2015). The  
110 mechanism of action of miPEPs is by enhancing the transcription and accumulation of the  
111 corresponding pri-miRNA, in a sort of positive feedback loop, that subsequently results in  
112 accentuated downregulation of the respective miRNA-targeted genes. (Couzigou et al, 2015). For  
113 instance, the overexpression of miPEP171b in *Medicago truncatula* led to the increased  
114 accumulation of endogenous miR171b (involved in the formation of lateral roots), which resulted in  
115 significant changes in root development (Couzigou et al, 2016). Moreover, in soybean (*Glycine*  
116 *max*), it was demonstrated for the first time that the exogenous application of well-chosen, synthetic  
117 miPEP172c had a positive impact in nodule formation, by inducing the overexpression of pri-  
118 miR172c, whose correspondent miR172c accumulation results in an increase in nodule formation  
119 and consequent improvement of N fixation (Couzigou et al., 2016)

120 More recently, Sharma et al. reported a miPEP in Arabidopsis, miPEP858, by screening  
121 the 1000 bp region upstream of pre-miR858 for small ORFs. They found miPEP858 was able to  
122 modulate the expression of targets gene involved in plant growth and development and also on the  
123 phenylpropanoid pathway, by inducing the expression of pri-miR858 (Sharma & Kamal Badola,  
124 2019).

125 Although screening for small ORFs, either in the precursor sequence of miRNA or in the region  
126 upstream of such precursor miRNA seems to be the mainstream method for finding putative  
127 miPEPs when you already have a miRNA or targeted gene in mind, others were also successful in  
128 screening for miPEPs using alternative molecular approaches such as homology based  
129 computational analysis using expressed sequence tags (ESTs) of a certain species genome by  
130 blasting it against miRNA sequences already described, to find homologous of miRNAs and then  
131 repeat the same methodologies of miRNA target prediction and pre-miRNA screening for small  
132 ORFs (Ram, Mukherjee, & Pandey, 2019).

133 Finally, in 2020, Chen and colleagues reported a miPEP in grapevine, miPEP171d1 which  
134 originated from miR171, a conserved miRNA within different plant species associated with root  
135 organ development and capable of promoting adventitious root formation and therefore able to  
136 overcome challenges in clonal propagation of *Vitis vinifera*, namely the difficulty in rooting in the  
137 cutting and layering process of grapevine (Chen et al., 2020). They screened for ORFs in the 500  
138 bp region upstream of the pre-miR171d and found three small ORFs which by transient expression  
139 and promoter activity assays found that the peptide encoded by the first ORF was able to increase  
140 the expression of vvi-MIR171d, thus named miPEP171d.

141 Although few studies about miPEPs are available, the discovery of miPEPs reveals a new layer of  
142 gene regulation at the post-transcriptional level and may present a key advantage in agronomy.

143 Taking these groundbreaking discoveries as basis, the objective of this work was to test the  
144 hypothesis that the exogenous application of a newly-identified putative grapevine miPEP by our  
145 group (miPEP164c – miPEP-MYBPA1) can modulate the secondary metabolism of grape berry  
146 cells by inhibiting PA biosynthetic pathway while simultaneously stimulating anthocyanin synthesis.  
147 The micropeptide miPEP164c is putatively targeting MYBPA1, as predicted *in silico*, a gene  
148 encoding for a transcription factor that acts as a positive regulator of proanthocyanidin synthesis  
149 by activating the expression of VvLAR and VvANR, the enzymes responsible for catechin and  
150 epicatechin synthesis, the building blocks of proanthocyanidins (Bogs et al., 2007). For that, a wide  
151 array of molecular biology and classic biochemistry approaches were combined to better assess  
152 the impact of miPEP164c exogenous treatments on the transcription of key genes involved in  
153 secondary metabolic pathways, on the biochemical activity of the corresponding key enzymes, and  
154 on the final concentration of secondary metabolites such as anthocyanins, proanthocyanidins and  
155 total phenolics.

156

## 157 **Material and Methods**

### 158 **In silico analyses**

159 A series of *in silico* analyses to identify potential miPEPs in grapevine by combining several  
160 bioinformatic tools and databases such as the bioinformatic tool psRNATarget Finder (Dai et al.,  
161 2018), a plant small regulatory RNA target predictor, with the aid of GenBank, was used to retrieve  
162 information on which, how and where (in the target RNA) miRNAs putatively regulated key genes  
163 directly or indirectly involved in the flavonoid biosynthetic pathway. The identified mature miRNAs  
164 of those targets of interest were then screened in miRBase (microRNA database) (Kozomara &  
165 Griffiths-jones, 2014) for their stem-loop sequences or pri-miRNA sequence, the non-mature  
166 sequence of the regulatory miRNAs possibly harboring small open reading frames (ORFs)  
167 corresponding to regulatory miPEPs. Finally, the obtained stem-lop sequences were then ran in a  
168 bioinformatic ORF finder tool that recognizes in the introduced sequence all possible ORFs that  
169 could translate into a small peptide, by defining several parameters based on the few miPEPs so  
170 far identified in the literature (Lauressergues et al., 2015).

171

### 172 **Solubilization of miPEPs**

173 Following *in silico* identification, the miPEP sequence was ordered from Smart Bioscience as 1 mg  
174 aliquot. Solubilization of the micropeptide was conducted as recommended by Smart-Bioscience  
175 Peptide Solubility Guidelines (<https://www.smart-bioscience.com/support/solubility/>). miPEP164c,  
176 putatively negatively regulating *VvMYBPA1*, was solubilized in 200  $\mu$ L of acetic acid (10%) and  
177 800  $\mu$ L of DMSO to a final concentration of 1 mg/mL. A solution of 200  $\mu$ L of acetic acid (10%) and  
178 800  $\mu$ L of DMSO was used as control in the exogenous treatments.

179

### 180 **Biological material**

181 Grape berry cell suspensions of the cultivar Gamay Freaux cv. were maintained in Gamborg B5  
182 medium in 250 mL flasks at 25 °C with constant agitation on a rotator shaker at 100 rpm and under  
183 16h/8 h photoperiod. The culture medium composition was as follows: 3 g/L Gamborg B5 salt  
184 mixture and vitamins; 30 g/L sucrose (3% m/v); 250 mg/L casein enzymatic hydrolysate; 0.1 mg/L  
185  $\alpha$ -naphthaleneacetic acid (NAA); 0.2 mg/L Kinetin, and a final pH of 5.7. The suspension-cultured  
186 cells were allowed to grow for 10 d, until the exponential phase, when they were subcultured by  
187 transferring 10 mL of cells to 30 mL of fresh medium.

188

### 189 **Exogenous addition of micropeptides to Gamay grape cells**

190 For each assay, immediately after sub-cultivation, 1  $\mu\text{M}$  of miPEP164c was exogenously added to  
191 the cell cultures, in a volume that represented no more than 0.15 % (v/v) of the total volume of the  
192 cell suspension. All cell suspensions, including control cells (treated with the same volume of  
193 control solution) were cultivated for 10 d with constant agitation and a 16h/8 h photoperiod. Cells  
194 were then collected, filtered and immediately frozen with liquid nitrogen and stored at  $-80\text{ }^{\circ}\text{C}$ . A part  
195 of cells of each experimental condition was lyophilized.

196

### 197 **Quantification of anthocyanins**

198 Anthocyanins were extracted from 100 mg of grape berry cells from each experimental condition.  
199 After adding 1 mL of 100% methanol, the suspensions were vigorously shaken for 30 min, following  
200 centrifugation at  $18.000\times g$  for 20 min. The supernatants were collected and 200  $\mu\text{L}$  of each  
201 supernatant was mixed with 1.8 mL of a solution of 25 mM KCl ( $\text{pH} = 1.0$ ) and absorbance was  
202 measured at 520 nm and 700 nm. Total anthocyanin quantification was calculated in relation to  
203 cyanidin-3-glucoside equivalents, as follows:

204

205

206 [Total anthocyanins] (mg/g FW) =

$$207 \frac{(A_{520} - A_{700}) \times \text{MW} \times \text{DF} \times 1000}{\epsilon \times 1}$$

208

209 where MW is the molecular weight of cyanidin-3-glucoside ( $449.2\text{ g mol}^{-1}$ ), DF is the dilution factor  
210 and  $\epsilon$  is the molar extinction coefficient of cyanidin-3-glucoside ( $26900\text{ M}^{-1}\text{ cm}^{-1}$ ).

211

212

### 213 **Quantification of proanthocyanidins**

214 Proanthocyanidin content was determined using an adapted colorimetric vanillin-HCl assay  
215 described by Broadhurst & Jones (1978). To extract proanthocyanidins, 1 mL of 100% methanol  
216 was added to 5 mg of lyophilized grape berry cells and vigorously shaken for 30 min followed by  
217 centrifugation at  $18000\times g$  for 15 min. Supernatants were collected and diluted in a 1:1 ratio with  
218 methanol to final volume of 500  $\mu\text{L}$ . The methanolic extracts were added to clean assay tubes  
219 wrapped with aluminum foil. Then, 3 mL of a solution of 4% (m/v) vanillic acid freshly prepared in  
220 methanol was added and mixed very gently. Finally, 1.5 mL of concentrated hydrochloric acid was  
221 added to each reaction tube and mixed very gently. The reactions were allowed to stand for 6 min

222 and the absorbance of the samples was measured spectrophotometrically at 500 nm. To discard  
223 absorbance interference caused by anthocyanin presence in the samples, control reactions for  
224 each condition were prepared with 3 mL of methanol instead of vanillic acid and the absorbance  
225 measured at 500 nm was discounted from the absorbance of reaction mixtures with vanillic acid.  
226 An epigallocatechin gallate (EGCG) standard curve, with concentrations ranging from 10 to 200  $\mu\text{g}$   
227 employing the same method was always prepared for each quantification of proanthocyanidin  
228 content.

229

### 230 **Protein extraction**

231 Protein extraction was conducted as described in Conde et al. (2016). Lyophilized grape berry cells  
232 were mixed with extraction buffer in approximately 1:1 (v/v) powder: buffer ratio. Protein extraction  
233 buffer contained 50 mM Tris-HCl, pH 8.9, 5 mM  $\text{MgCl}_2$ , 1 mM EDTA, 1 mM PMSF, 5 mM DTT and  
234 0.1 % (v/v) Triton X-100. Homogenates were thoroughly vortexed and centrifuged at 18000xg for  
235 15 min at 4 °C. Supernatants were maintained on ice and used for all enzymatic assays. Total  
236 protein concentrations of the extracts were determined by the method of Bradford (Bradford, 1976)  
237 using bovine serum albumin as a standard.

238

### 239 **Enzymatic activity assays**

240 The biochemical activity of UDP-Glucose:flavonoid 3-O Glucosyltransferase (UFGT) was  
241 determined as described by Conde et al. (2016) with some adaptations. The assay mixture  
242 contained 385  $\mu\text{L}$  of 100 mM Tris-HCl reaction buffer (pH 8), 100  $\mu\text{L}$  of enzyme extract, 10  $\mu\text{L}$  of  
243 50 mM UDP-glucose and the reaction was initiated with 5  $\mu\text{L}$  of 100 mM quercetin as substrate for  
244 the enzyme activity (saturating concentration) to a final reaction volume of 500  $\mu\text{L}$ . Each mixture  
245 was incubated for 30 min in the dark with gentle shaking. After incubation, dilutions were prepared  
246 with 100  $\mu\text{L}$  of each assay mixture and 900  $\mu\text{L}$  of Tris-HCl reaction buffer and absorbance was  
247 read at 350 nm immediately after (t=0) and 30 min later (t=30) to follow the production of quercetin  
248 3-glucoside ( $\epsilon = 21877 \text{ M}^{-1} \text{ cm}^{-1}$ ).

249 Leucoanthocyanidin reductase (LAR) enzymatic activity was measured by spectrophotometrically  
250 monitoring the conversion of dihydroquercetin to (+)-catechin following the method of Gagné et al.  
251 (2009) with some adaptations. The assay mixture contained 1,7 mL of Tris-HCl buffer (0.1 M, pH  
252 7.5), 300  $\mu\text{L}$  of protein extract, 2  $\mu\text{L}$  of NADPH (100 mM) and the reaction was initiated by adding



253 1  $\mu\text{L}$  of dihydroquercetin (10 mg  $\text{mL}^{-1}$  in DMSO). The production of (+)-catechin ( $\epsilon = 10233 \text{ M}^{-1}$   
254  $\text{cm}^{-1}$ ) was followed at 280 nm for 30 min.

255 The biochemical activity of anthocyanidin reductase (ANR) was determined as described by Zhang  
256 et al. (2012) with some adaptations. The assay mixture contained 1,5 mL of PBS buffer (0.1 M, pH  
257 6.5), 60  $\mu\text{L}$  of enzyme extract, 40  $\mu\text{L}$  of ascorbic acid (20 mM), 50  $\mu\text{L}$  of cyanidin chloride (2 mM)  
258 and the reaction was initiated by adding 75  $\mu\text{L}$  of NADPH (20 mM) followed by a 1/10 dilution with  
259 PBS reaction buffer for proper absorbance measure. The enzyme activity was monitored by  
260 measuring the rate of NADPH ( $\epsilon = 6,22 \text{ mM}^{-1} \text{ cm}^{-1}$ ) oxidation at 340 nm for 20 min, at 45°C.

261

### 262 **RNA extraction and cDNA synthesis**

263 Total RNA extraction was performed according to Reid et al. (2006) in combination with purification  
264 steps from the GRS Total Plant RNA extraction kit. After treatment with DNase I (Qiagen), cDNA  
265 was synthesized from 1  $\mu\text{g}$  of total RNA using Maxima first strand cDNA synthesis kit from Thermo  
266 Scientific, following the manufacturer's instructions. RNA concentration and purity were determined  
267 using Nanodrop and its integrity assessed in a 1% agarose gel stained with SYBR Safe  
268 (Invitrogen<sup>TM</sup>, Life Technologies).

### 269 **Transcriptional analyses by real-time qPCR**

270 Quantitative real-time PCR was performed with QuantiTect SYBR Green PCR Kit (Qiagen) in a  
271 CFX96 Real-Time Detection System (Bio-Rad), using 1  $\mu\text{L}$  of cDNA in a final reaction volume of  
272 10  $\mu\text{L}$  per well. Specific primer pairs used for each target gene are listed in Table 1. Melting curve  
273 analysis was performed for specific gene amplification confirmation. As reference genes, *VvACT1*  
274 (actin) and *VvGAPDH* (glyceraldehyde-3-phosphate dehydrogenase) were selected, as these  
275 genes were proven to be very stable and ideal for qPCR normalization purposes in grapevine (Reid  
276 et al., 2006). For all experimental conditions tested, two independent runs with triplicates were  
277 performed. The expression values were normalized by the average of the expression of the  
278 reference genes as described by Pfaffl (2001) and analyzed using the software Bio-Rad CFX  
279 Manager (Bio-Rad).

### 280 **Statistical analyses**

281 The results were statistically analyzed by Student's t-test using Prism vs. 6 (GraphPad Software,  
282 Inc.). For each condition, statistical differences between mean values are marked with asterisks.

283

284 **Table 1.** Primers forward (F) and reverse (R) used for gene expression analysis by qPCR.

| Gene             | Accession number  | Primers                                | Ref.                                                           |
|------------------|-------------------|----------------------------------------|----------------------------------------------------------------|
| <b>VvPAL1</b>    | GSVIVG01025703001 | F: 5'-CCGAACCGAATCAAGGACTG-3'          | Boubakri et al. (2013)                                         |
|                  |                   | R: 5'-GTTCCAGCCACTGAGACAAT-3'          |                                                                |
| <b>VvSTS1</b>    | GSVIVT0101059001  | F: 5'-CGAAGCAACTAGGCATGTGT-3'          | Boubakri et al. (2013)                                         |
|                  |                   | R: 5'-CTCCCCAATCCAATCCTTCA-3'          |                                                                |
| <b>VvCHS1</b>    | GSVIVT01032968001 | F: 5'-GTCCCAGGGTTGATTTCCAA-3'          | Boubakri et al. (2013)                                         |
|                  |                   | R: 5'-TCTCTTCTTCAGACCCAGTT-3'          |                                                                |
| <b>VvCHS3</b>    | GSVIVT01000521001 | F: 5'-GAAGTCGGCTGAGGAAGGGCTGAAGACC-3'  | Bonghi et al. (2012)                                           |
|                  |                   | R: 5'-TCAACAGTGAGCCCTGGTCCGAAAC-3'     |                                                                |
| <b>VvFLS1</b>    | GSVIVT01008913001 | F: 5'-CAGGGCTTGCAGGTTTTAG-3'           | Downey et al. (2003)                                           |
|                  |                   | R: 5'-GGGTCTTCTCCTGTTCACG-3'           |                                                                |
| <b>VvDFR</b>     | GSVIVT01009743001 | F: 5'-GGCTTTCTAGCAGAGCGTA-3'           | Bogs et al. (2006)                                             |
|                  |                   | R: 5'-ACTCTATTTCCGGCACATT-3'           |                                                                |
| <b>VvLDOX</b>    | GSVIVT01032809001 | F: 5'-ACCTTCATCCTCCACAACAT – 3'        | Bogs et al. (2005)                                             |
|                  |                   | R: 5'-AGTAGAGCCTCCTGGGTCTT – 3'        |                                                                |
| <b>VvLAR1</b>    | GSVIVT01011958001 | F: 5'-CAGGAGGCTATGGAGAAGATAC – 3'      | Bogs et al. (2005)                                             |
|                  |                   | R: 5'-ACGCTTCTCTGTACATGTTG – 3'        |                                                                |
| <b>VvANR</b>     | GSVIVT01006396001 | F: 5'-CAATACCAGTGTTCCTGAGC – 3'        | Bogs et al. (2005)                                             |
|                  |                   | R: 5'-AAACTGAACCCCTCTTTCAC – 3'        |                                                                |
| <b>VvUFGT1</b>   | GSVIVT01024419001 | F: 5'-TGCAGGGCCTAACTACTCT-3'           | Designed with the aid of QuantiPrime (Arvidsson et al. (2008)) |
|                  |                   | R: 5'-GCAGTCGCCTTAGGTAGCAC-3'          |                                                                |
| <b>VvGST4</b>    | GSVIVT01035256001 | F: 5'-AAGGATCCATGGTGATGAAGGTGTATGGC-3' | Conn et al. (2008)                                             |
|                  |                   | R: 5'-AACTGCAGAAGCCAACCAACAAAC-3'      |                                                                |
| <b>VvMATE1</b>   | GSVIVT01028885001 | F: 5'-TGCTTTTGTGATTTGTTAGAGG-3'        | Gomez et al. (2009)                                            |
|                  |                   | R: 5'-CCCTTCCCGATTGAGAGTA-3'           |                                                                |
| <b>VvABCC1</b>   | GSVIVT01028722001 | F: 5'-CTCCACTGGTCTCTGCTTC-3'           | Designed with the aid of QuantiPrime (Arvidsson et al. (2008)) |
|                  |                   | R: 5'-AGCCTGCTTCGAAAGTACCA-3'          |                                                                |
| <b>VvMYBPA1</b>  | GSVIVT01027182001 | F: 5'-AGATCAACTGGTTATGCTTGCT-3         | Bogs et al. (2007)                                             |
|                  |                   | R: 5'-AACACAAATGTACATCGCACAC-3         |                                                                |
| <b>VvmiR164c</b> | MI006505          | F: 5'-TTGAGCAAGATGGAGAAGCA – 3'        | Designed in this study                                         |
|                  |                   | R: 5'-ATTGGTTTGTGGTGCATGAG – 3'        |                                                                |
| <b>VvActin</b>   | GSVIVT01026580001 | F: 5'-GTGCTGCCATGTATGTTGCC-3'          | Conde et al. (2015)                                            |
|                  |                   | R: 5'-GCAAGGTCAAGACGAAGGATA-3'         |                                                                |
| <b>VvGADPH</b>   | GSVIVT00009717001 | F: 5'-CACGGTCAGTGAAGCATCAT-3'          | Conde et al. (2015)                                            |
|                  |                   | R: 5'-CCTGTGTCAGTGAACACACCAG-3'        |                                                                |

285

286

## 287 Results

288

### 289 Identification and *in silico* analysis of the candidate grapevine micropeptide miPEP164c

290 An *in silico* analysis for micropeptide screening led to the selection of miPEP164c a candidate

291 miPEP with putative regulatory function in grape berry flavonoid biosynthesis metabolic pathway,

292 particularly in the branch of proanthocyanidin synthesis. miR164c was predicted *in silico* to post-

293 transcriptionally inhibit grapevine transcription factor *VvMYBPA1*, involved in the activation of  
 294 flavonoid synthesis, specifically of proanthocyanidin synthesis (via LAR1, LAR2 and ANR  
 295 activation). Relevant information obtained by the *in silico* analysis regarding the miPEP selected  
 296 for this study, including its aminoacidic sequence, attributed name and respective mature miRNA  
 297 name and miRbase accession number, as well as that of its precursor miRNA (pre-miRNA), is  
 298 detailed in Supplementary Table 2.

299

300 **Table 2.** Detailed information about the micropeptide identified by an *in silico* analysis and selected for this study and  
 301 its corresponding mature miRNA and mode of action

| miPEP                       | Aminoacid sequence | miRNA                       | Stem-loop sequence | Mode of action            | Predicted target |
|-----------------------------|--------------------|-----------------------------|--------------------|---------------------------|------------------|
| miPEP164c<br>(miPEP-MYBPA1) | MEKQGTCITSSCTTNQ   | miR164c<br>(MIMAT0005660) * | MI006505 *         | Inhibition in translation | VvMYBPA1         |

302 \*Accession code for miRBase ((Kozomara & Griffiths-Jones, 2014)

303

### 304 **Effect of miPEP164c exogenous application on the abundance of miR164c and its putative** 305 **target transcription factor VvMYBPA1**

306 To confirm if miPEP164c exogenous application is indeed activating the accumulation of its *in silico*  
 307 predicted miRNA (miR164c), gene expression analysis by real-time qPCR of the non-mature pre-  
 308 miR164c was performed on cells treated with miPEP164c. As shown in Figure 1A, 10 days after  
 309 treatment, the transcript levels of pre-miR164c were stimulated (3.5-fold increase) by miPEP164c  
 310 exogenous application. A slight, non-significant increase in the transcript levels of *VvMYBPA1* was  
 311 also observed after 10 days of miPEP164c treatment (Fig. 1B).

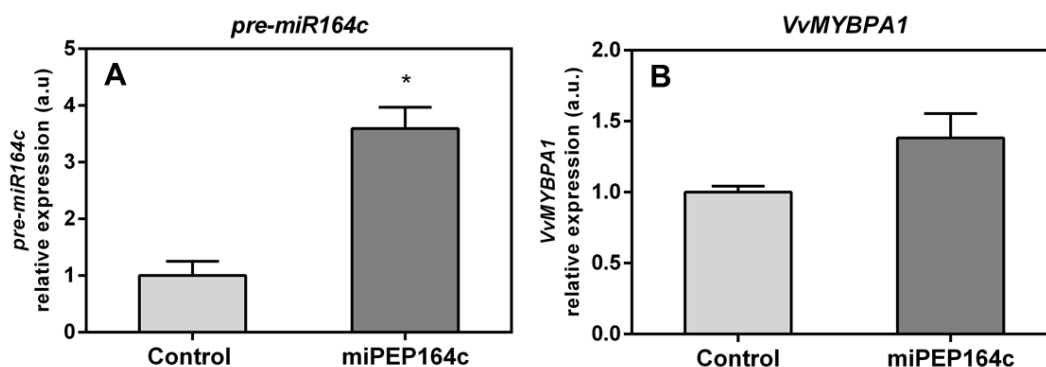

312

313 **Figure 1. Steady-state transcript levels of *pre-miR164c* (A) and *VvMYBPA1* (B) in suspension-cultured grape**  
 314 **berry cells (cv. Gamay) 10 d after elicitation with 1  $\mu$ M miPEP164c.** Gene expression analysis, by real-time qPCR  
 315 was normalized with the expression of reference gene *VvACT1* and *VvGAPDH*. Values are the mean  $\pm$  SEM. Asterisks  
 316 indicate statistical significance (Student's t-test; \* P < 0.05).

317

## 318 Effect of miPEP164c exogenous application on grape berry key secondary metabolites

319 Spectrophotometric quantifications of grape berry cells secondary metabolites revealed a  
320 significant increase of 31% in anthocyanin content (Fig. 2A) while total proanthocyanidins  
321 significantly decreased by 26% (Fig. 2B), after 10 days of treatment with 1  $\mu\text{M}$  miPEP164c.

322

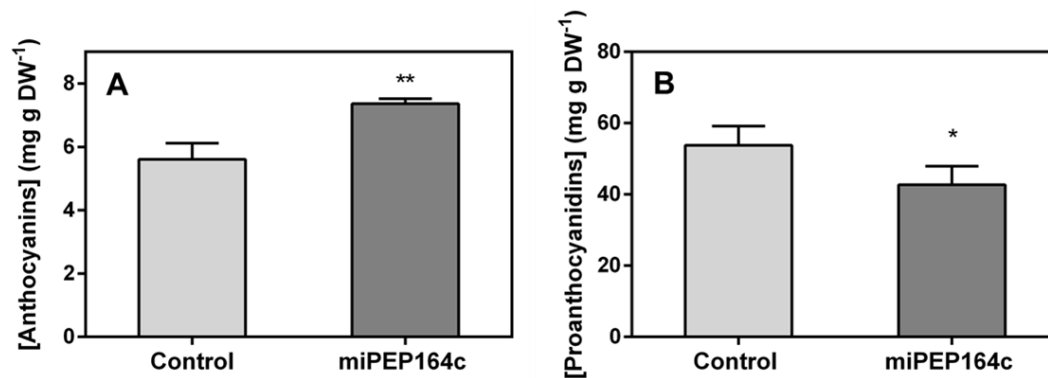

323

324 **Figure 2. Effect of the exogenous application miPEP164c (1  $\mu\text{M}$ ) on total anthocyanin content (A) and on total**  
325 **proanthocyanidin content (B) in suspension-cultured grape berry cells (cv. Gamay) 10 d after elicitation with**  
326 **1  $\mu\text{M}$  miPEP164c. Anthocyanin concentration is represented as mg of cyanidin 3-glucoside (C-3-G) equivalents per g**  
327 **of fresh weight (FW). Asterisks indicates statistical significance (Student's t-test; \*P<0.05 \*\* P<0.01).**

328

## 329 Transcriptional and biochemical changes induced by miPEP164c on the proanthocyanidin- 330 synthesizing branch

331 Analysis by real-time qPCR showed that *VvLAR1* expression was reduced by 20% in Gamay cells  
332 elicited with 1  $\mu\text{M}$  miPEP164c compared to control cells (Fig. 3B). In agreement with the observed  
333 decrease in *VvLAR1* expression levels under miPEP164c treatment, the specific activity of LAR  
334 was 3-fold reduced (Fig. 3A).

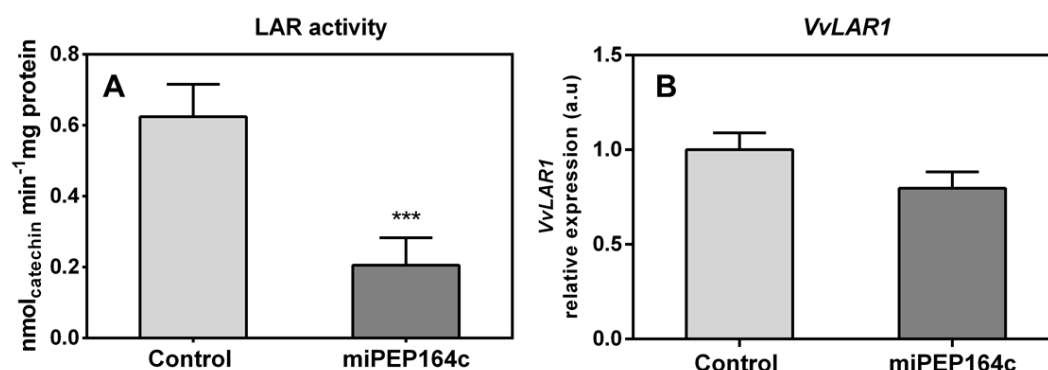

335

336 **Figure 3. Effect on the specific activity of LAR (A) and steady-state transcript levels of *VvLAR1* (B) in**  
337 **suspension-cultured grape berry cells (cv. Gamay) 10 d after elicitation with 1  $\mu\text{M}$  miPEP164c. Gene expression**  
338 **analysis, by real-time qPCR was normalized with the expression of reference gene *VvACT1* and *VvGAPDH*. Values**  
339 **are the mean  $\pm$  SEM. Asterisks indicate statistical significance (Student's t-test; \*\*\* P < 0.001). LAR biochemical activity**

340 represented as the  $V_{max}$  in grape berry cells under miPEP164c treatment. Values are the mean  $\pm$  SEM. Asterisks  
341 indicates statistical significance (Student's t-test; \*\*\*  $P < 0.001$ )

342

343 The specific activity of ANR also decreased (by 27%) in Gamay cells elicited with 1  $\mu\text{M}$  miPEP164c  
344 (Fig. 4A), but *VvANR* expression was not repressed, instead a 18% increase of the steady-state  
345 transcript levels was observed, although statistically not significant (Fig. 4B)

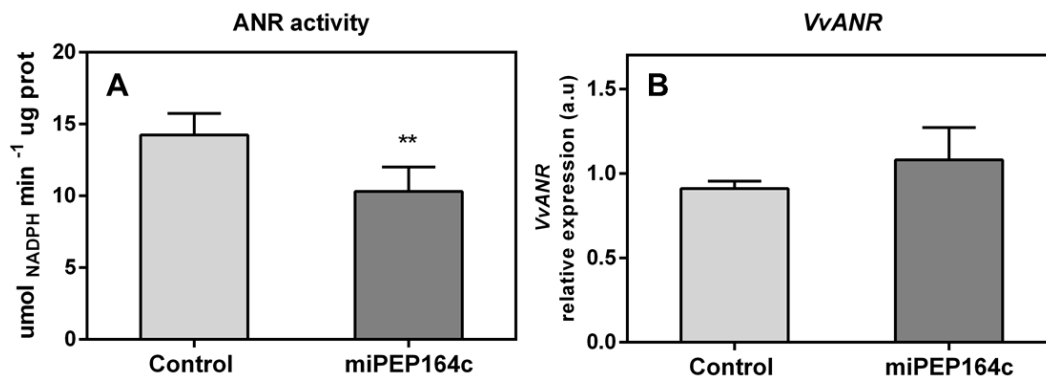

346

347 **Figure 4. Effect on the specific activity of ANR (A) and steady-state transcript levels of *VvANR* (B) in**  
348 **suspension-cultured grape berry cells (cv. Gamay) 10 d after elicitation with 1  $\mu\text{M}$  miPEP164c.** Gene expression  
349 analysis, by real-time qPCR was normalized with the expression of reference gene *VvACT1* and *VvGAPDH*. Values  
350 are the mean  $\pm$  SEM. ANR biochemical activity, represented as the  $V_{max}$  in grape berry cells under miPEP164c  
351 treatment. Values are the mean  $\pm$  SEM. Asterisks indicates statistical significance (Student's t-test; \*\*  $P < 0.01$ )

352

353 **Transcriptional and biochemical changes induced by miPEP164c on the anthocyanin-**  
354 **synthesizing branch**

355 The expression of *VvUFGT1* was strongly stimulated by miPEP164c application, reflected by a 4-  
356 fold increase in the expression levels in grape berry cells under this treatment (Fig. 5B), which  
357 corroborates with a significant increase in the total concentration of anthocyanins observed  
358 previously (Fig. 2A). In agreement with *VvUFGT1* transcripts increase, the biochemical activity of  
359 UFGT was 3.2-fold higher in miPEP164c treated cells, reaching a  $V_{max}$  of 3.4  $\mu\text{mol h}^{-1}$  mg protein-  
360 <sup>1</sup> (Fig. 5A).

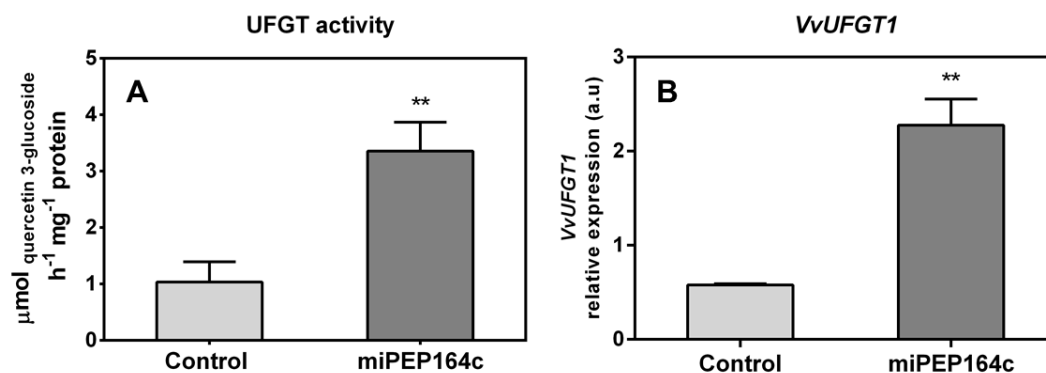

361

362 **Figure 5. Effect on the specific activity of UFGT (A) and steady-state transcript levels of *VvUFGT1* (B) in**  
363 **suspension-cultured grape berry cells (cv. Gamay) 10 d after elicitation with 1 μM miPEP164c.** Gene expression  
364 analysis, by real-time qPCR was normalized with the expression of reference gene *VvACT1* and *VvGAPDH*. Values  
365 are the mean ± SEM. Asterisks indicate statistical significance (Student's t-test; \*\* P < 0.01). UFGT biochemical activity,  
366 represented as the  $V_{max}$  in grape berry cells under miPEP164c treatment. Values are the mean ± SEM. Asterisks  
367 indicates statistical significance (Student's t-test; \*\* P < 0.01)

368

369 The expression levels of *VvDFR* were also significantly stimulated, with an increase of 2-fold in  
370 grape berry cells 10 days after miPEP164c treatment (Fig. 6A). *VvLDOX* was also significantly  
371 stimulated under this treatment, increasing its expression levels by 42% when compared to control  
372 cells (Fig. 6B).

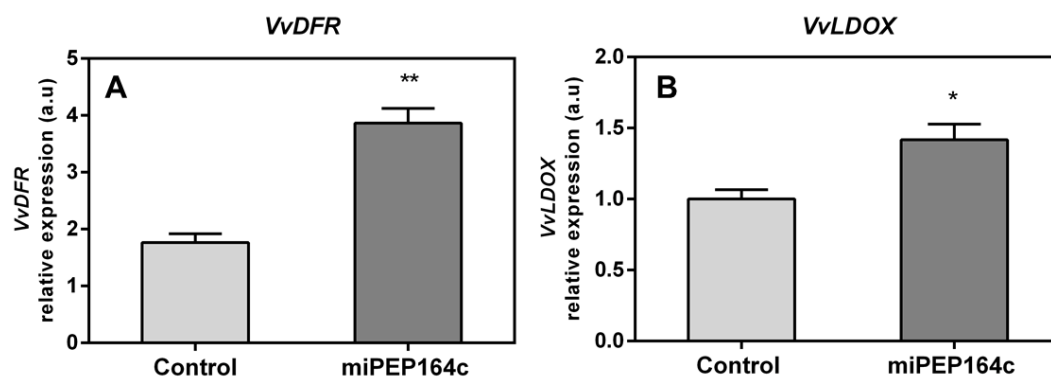

373

374 **Figure 6. Steady-state transcript levels of *VvDFR* (A) and *VvLDOX* (B) in suspension-cultured grape berry cells**  
375 **(cv. Gamay) 10 d after elicitation with 1 μM miPEP164c.** Gene expression analysis, by real-time qPCR was  
376 normalized with the expression of reference gene *VvACT1* and *VvGAPDH*. Values are the mean ± SEM. Asterisks  
377 indicate statistical significance (Student's t-test; \* P < 0.05, \*\* P < 0.01).

378

379 Transcriptional analysis showed that the expression of *VvGST4* under miPEP164c treatment also  
380 increase 2-fold (Fig 7A). Similarly, the transcript levels of *VvMATE1* increased by 55% (Fig 7B),  
381 while the expression of *VvABCC1* did not seem to be affected by treatment with this micropeptide  
382 (Fig. 7C). These genes encode transporters that accumulate anthocyanins in the vacuole.

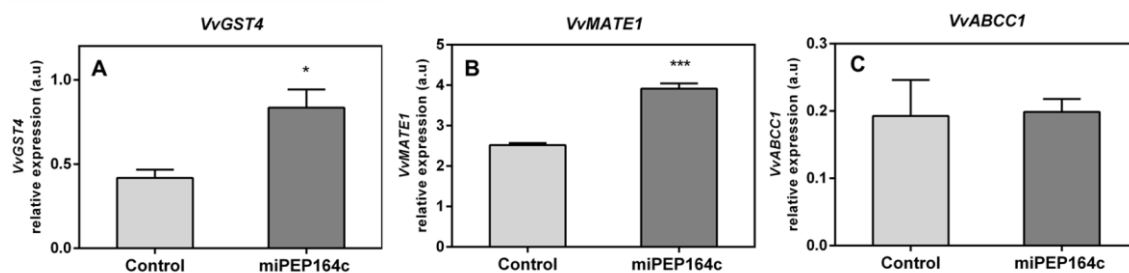

383

384 **Figure 7. Steady-state transcript levels of VvGST4 (A), VvMATE1 (B) and VvABCC1 (C) in suspension-cultured**  
385 **grape berry cells (cv. Gamay) 10 d after elicitation with 1  $\mu$ M miPEP164c.** Gene expression analysis, by real-time  
386 qPCR was normalized with the expression of reference gene *VvACT1* and *VvGAPDH*. Values are the mean  $\pm$  SEM.  
387 Asterisks indicate statistical significance (Student's t-test; \* P < 0.05, \*\*\* P < 0.001).

388

389

## 390 Discussion

391 Grape berry secondary metabolism generates, by a cascade of reactions scattered through  
392 different branches of the phenylpropanoid pathway, a wide range of bioactive compounds with key  
393 roles in plant defense responses and with several health-related benefits to humans, making them  
394 metabolites of interest for many industries (Teixeira et al., 2013). Therefore, the search for new  
395 strategies to modulate these complex pathways in the hopes of either minimizing the effects of  
396 several stress factors in the composition and quality of grape secondary metabolites or to increase  
397 the synthesis and accumulation of bioactive metabolites of interest such as antioxidant compounds  
398 like anthocyanins, is a research line of great importance, not only to the viticulture industry but that  
399 can also be applied in several industries of health-promoting products (Zhang et al., 2015). In the  
400 present study, we sought to validate a new and promising strategy to modulate the secondary  
401 metabolism of Gamay grape berry cells by testing a synthetic miPEP, putatively enhancing the  
402 transcription and accumulation of miR164c and ultimately promoting a more pronounced silencing  
403 of its predicted target. Because this transcription factor is involved in the molecular activation of  
404 key genes in the proanthocyanidin pathway, ultimately, we wanted to evaluate if a miPEP-based  
405 treatment could regulate grape berry secondary metabolism, by activating miRNA-mediated post-  
406 transcription silencing mechanisms of specific targets. Results obtained were very promising as  
407 this treatment could represent an innovative and easy-to-apply strategy to modulate the synthesis  
408 of more quality-related compounds, resulting in crops with added-value characteristics, without the  
409 need for more drastic, time consuming and more expensive strategies, as genetic transformation  
410 of crops.

411

412 **Elicitation of Gamay cells with miPEP164c induces accumulation of miR164c and**  
413 **consequent miR164c-mediated inhibition of proanthocyanidin biosynthetic pathway**

414 Overall, results confirmed that the exogenous application of miPEP164c is indeed enhancing the  
415 accumulation of miR164c which ultimately resulted in a more pronounced post-transcriptional  
416 silencing of transcription factor VvMYBPA1 and consequently of MYBPA1-activated genes, here  
417 observed by a significant downregulation of LAR and ANR specific activity resulting in a significant  
418 decrease of 26% of total proanthocyanidin content in cells under miPEP164c treatment.

419 Gene expression analysis by real-time qPCR confirmed that miPEP164c increased the  
420 expression levels of the pre-miR164c in Gamay cells. Thus, a positive loop was established, in  
421 which a consequent increased translation into miPEP164c, ultimately results in higher levels of  
422 mature miR164c and accentuated negative regulation of the target gene *VvMYBPA1*. *In silico*  
423 analyses suggests that mode of action of miR164c is through inhibition of the translation of  
424 *VvMYBPA1*, not by cleavage of the target messenger RNA, due to a lack of 100% complementarity  
425 between the guide miRNA and the target mRNA (Waterhouse & Hellens, 2015). This goes in  
426 agreement with our results showing that the treatment with miPEP164c did not induce any  
427 significant changes in the expression levels of *VvMYBPA1*.

428 Evidence for the involvement of post-transcriptional silencing of *VvMYBPA1* mediated by  
429 miPEP164c was obtained when the MYBPA1-activated enzyme *VvLAR* was clearly down-  
430 regulated. Both *VvANR* and *VvLAR1*, are key genes leading to the synthesis of proanthocyanidins  
431 (Gagné et al., 2009). However, the expression of *VvANR*, encoding for the enzyme that synthesizes  
432 epicatechins from anthocyanidins, was not affected, possibly to compensate the decreased activity  
433 of *VvLAR*, in order to ensure a certain amount of monomers for proanthocyanidins biosynthesis.  
434 Also, *VvANR* expression may be regulated by several other regulatory proteins, such as *VvMYC1*,  
435 a bHLH transcription factor that physically interacts with MYB-like transcription factors like MYBPA1  
436 and MYB5a/b to coordinate the regulation of *VvANR*, and therefore silencing of one regulator may  
437 be overcome by another regulatory mechanism (Heppel, 2010).

438

439 **Proanthocyanidin synthesis was inhibited by miPEP164c while anthocyanin synthesis was**  
440 **simultaneously increased**

441 The observed significant increase in anthocyanin total content in Gamay cells mediated by the  
442 application of miPEP164c corroborates our hypothesis that a miPEP164c-mediated silencing of  
443 proanthocyanidin synthesis would divert the carbon flow to the anthocyanin branch, due to the  
444 constant competition of both pathways for the same substrates, as reported before (Liao et al.,  
445 2015). Gene expression analysis of *VvUFGT1*, that glycosylates anthocyanidins into anthocyanins,



446 revealed a strong upregulation of its expression levels in response to the elicitation with the  
447 micropeptide which goes in agreement with the observed increase of the UFGT specific activity  
448 that also increased.

449 In *V. vinifera* two types of anthocyanin tonoplast transporters that accumulate anthocyanins  
450 in the vacuole were identified: primary transporters from the ATP-binding cassette (ABC) family,  
451 such as the *VvABCC1* who requires the presence of reduced glutathione (GSH) to properly  
452 transport anthocyanins, through the tonoplast, into the vacuole (Jiang et al., 2019); and tonoplast  
453 secondary transporters like *VvMATE1* (anthoMATE) of the multidrug and toxic extrusion family that  
454 use the H<sup>+</sup> gradient to transport mostly acylated anthocyanins (Gomez et al., 2009). Also crucial  
455 for anthocyanin stabilization and transport are the glutathione S-transferases, as the paradigmatic  
456 case of grapevine's *VvGST4*, to promote anthocyanin S-conjugation with reduced glutathione for  
457 anthocyanin-stabilization purposes (Conn et al., 2008). Several studies on the role of GSTs in  
458 anthocyanin accumulation have described GSTs as escort/carrier proteins, binding anthocyanins  
459 to form a GST-anthocyanin complex, protecting them from oxidation and guiding anthocyanins from  
460 the cytosolic surface of the ER to the vacuole for proper storage mediated by tonoplast transporters  
461 such as *VvMATE1* and *VvABCC1* (Zhao & Dixon, 2010) (Jiang et al., 2019). Our results strongly  
462 supported that anthocyanin transport capacity to the vacuole, where they are stored in grape berry  
463 cells, was also stimulated by miPEP164c application as the expression of the anthocyanin tonoplast  
464 transporter *VvMATE1* and anthocyanin carrier protein *VvGST4*, was upregulated by this  
465 micropeptide. It is not understood how plants choose between ATP-hydrolysis-dependent or  
466 H<sup>+</sup>/Na<sup>+</sup>-gradient dependent mechanisms for transport of native metabolites or xenobiotics.  
467 However, it is believed that the conjugation ligands, such as glucose or glutathione, play a key role  
468 in the determination of which transport mechanism will be used (Zhao & Dixon, 2010). However,  
469 the expression of *VvABCC1* was not affected by miPEP164c contrarily to what would be expected  
470 considering the upregulation of *VvGST4* expression. This could be due to the presence of other  
471 regulatory proteins affecting the expression of *VvABCC1*, other phenolic substrates that also need  
472 to be transported by this mechanism, the majority of anthocyanins might not be in the glycosylated  
473 form, which is the preferred form of anthocyanins of this type of transporter, or simply because it is  
474 competing with the upregulated *VvMATE1* transporter for anthocyanins (Francisco et al., 2013).

475 The increased anthocyanin concentration in treated cells may have also resulted from the  
476 observed stimulatory effect of the micropeptide on the transcription of several intermediates along  
477 the flavonoid pathway (*VvCHS1*) and anthocyanin synthesis pathway (*VvDFR*, *VvLDOX* and  
478 *VvUFGT1*). The observation that the micropeptide also induced a slight decrease in the expression  
479 of *VvFLS1* corroborates previous studies in flowers where the flavonol branch is constantly

480 competing with the anthocyanin branch for precursors for the synthesis of white pigments and of  
481 red to blue pigments, respectively (Zhang et al., 2017).

482

### 483 **Conclusion**

484 In this study, recurring to a combination of molecular and biochemical approaches, we revealed  
485 that miPEP164c exogenous application induced a strong up-regulation of genes involved in  
486 anthocyanin synthesis, transport, and accumulation in the vacuole. Additionally, miPEP164c  
487 provoked a downregulation of proanthocyanidin synthesis (a pathway that directly competes with  
488 the anthocyanin-biosynthetic pathway), due to a decrease in *VvLAR1* expression levels with a  
489 corresponding very significant decrease in LAR total biochemical activity as well as a significant  
490 decrease in ANR biochemical activity.

491 This upregulation of the anthocyanin biosynthetic route seems to be an indirect effect of  
492 miPEP164c putatively inhibiting transcription factor MYBPA1, a known positive regulator of  
493 proanthocyanidin synthesis. Thus, these metabolic alterations triggered by miPEP164c clearly  
494 resulted in higher concentration of anthocyanins and lower concentration of proanthocyanidins, due  
495 to miR164c-mediated negative regulation of proanthocyanidin-related transcription factor  
496 *VvMYBPA1* and, consequently, *VvLAR1* and *VvANR*, ultimately leading to proanthocyanidin  
497 synthesis inhibition and anthocyanin synthesis stimulation as these pathways directly compete for  
498 substrate, in a mechanism illustrated in Figure 8.

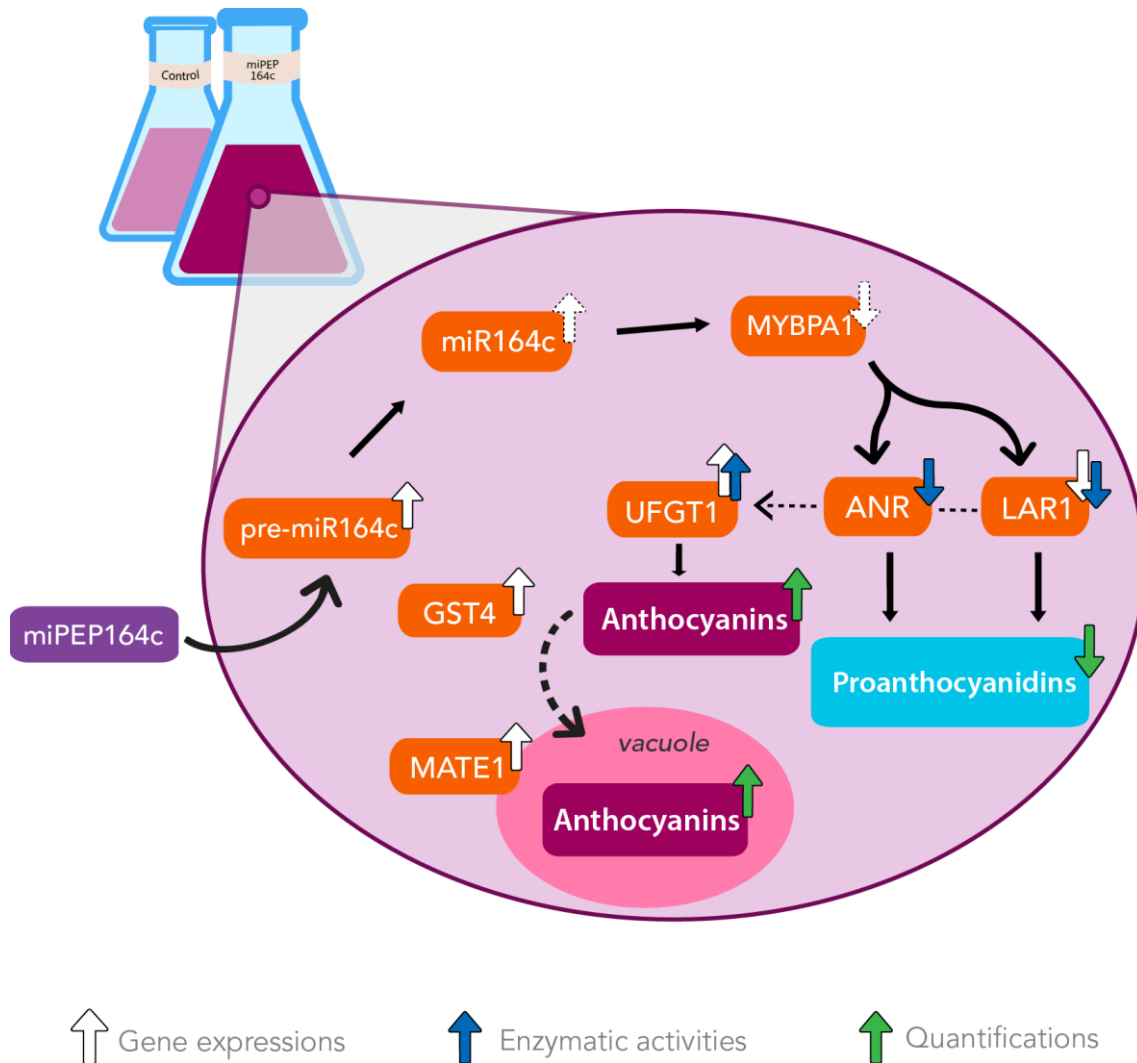

499

500 **Figure 8. The exogenous application of miPEP164c increases anthocyanin synthesis and accumulation while**  
 501 **decreasing proanthocyanidin synthesis by enhancing miR164c-mediated downregulation of PA-synthetic**  
 502 **pathway in Gamay grape berry cell suspensions.** Addition of miPEP164c provoked an increase in the transcription  
 503 of pre-miR164c and consequently of its mature form, miR164c, which putatively led to a decrease in the translation of  
 504 transcription factor MYBPA1. This inhibition in MYBPA1 translation resulted in a downregulation of *VvLAR1* expression  
 505 and *ANR* total biochemical activity, decreasing the intracellular concentration  
 506 of proanthocyanidins. This downregulation of the proanthocyanidin pathway indirectly led to the stimulation of the  
 507 anthocyanin synthesis by increasing *VvUFGT1* expression and *UFGT* total biochemical activity, as well as vacuolar  
 508 accumulation, as shown by *VvGST4* and *VvMATE1* overexpression.  
 509

510 Taking together, a miPEP-based treatment is a promising new, cost-efficient strategy to improve  
 511 plant cell characteristics, with the ability to modulate the secondary metabolism of plants,  
 512 enhancing the synthesis of quality-related compounds, without the need for genetic engineering of  
 513 crops. Applied *in planta* it may have the capacity to induce metabolic changes and to be a potential  
 514 promising technique to improve berry quality or maybe even the resistance of grapevine to biotic  
 515 stressors such as *Botrytis cinerea* infection, by inducing the production of bioactive compounds  
 516 that will help plant defense, or even to abiotic stress in the form of extreme UV-radiation due to the

517 anthocyanins role in protecting grape berries against this increasingly more common environmental  
518 factor, considering that miPEP164c led to a higher anthocyanin intracellular concentration.  
519 Considering this potential, the fact that the exogenous application of miPEPs can specifically  
520 modulate plant secondary metabolism may indeed have great agronomical applications.

521 In a more fundamental research level, further studies are required to fully understand the scope of  
522 miPEP-mediated post-transcriptional silencing, as little is known about its mechanisms of action,  
523 transport or stabilization in the cytoplasm. Since miPEPs were first discovered, many questions  
524 have arisen about their mode of action: how do they interact with the transcriptional machinery to  
525 enhance the transcription of the corresponding pri-miRNA? Do all miRNAs have the ability to  
526 encode miPEPs? What are the mechanisms that allow synthetic miPEPs to be transported through  
527 the cell wall and cell membrane into the nucleus? And how are the primary transcripts of miRNAs  
528 able to be translated in the cytoplasm when they are capped and polyadenylated RNA molecules  
529 rapidly recognized by the dicing complex?

530

## 531 REFERENCES

- 532 Bogs, J., Jaffe, F. W., Takos, A. M., Walker, A. R., & Robinson, S. P. (2007). The Grapevine  
533 Transcription Factor VvMYBPA1 Regulates Proanthocyanidin Synthesis during Fruit  
534 Development. *Plant Physiology*, 143(3), 1347–1361. doi: 10.1104/pp.106.093203
- 535 Bradford, M. M. (1976). A Rapid and Sensitive Method for the Quantitation Microgram Quantities  
536 of Protein Utilizing the Principle of Protein-Dye Binding, 254, 248–254.
- 537 Broadhurst, R. B., & Jones, W. T. (1978). Analysis of condensed tannins using acidified vanillin.  
538 *Journal of the Science of Food and Agriculture*, 29(9), 788–794.  
539 doi: 10.1002/jsfa.2740290908
- 540 Budak, H., & Akpinar, B. A. (2015). Plant miRNAs: biogenesis, organization and origins.  
541 *Functional and Integrative Genomics*, 15(5), 523–531.  
542 doi: 10.1007/s10142-015-0451-2
- 543 Cavallini, E., Matus, J. T., Finezzo, L., Zenoni, S., Loyola, R., Guzzo, F., et al. (2015). The  
544 Phenylpropanoid Pathway Is Controlled at Different Branches by a Set of R2R3-MYB C2  
545 Repressors in Grapevine. *Plant Physiology*, 167(4), 1448–1470.  
546 doi: 10.1104/pp.114.256172
- 547 Cavallini, E., Zenoni, S., Finezzo, L., Guzzo, F., Zamboni, A., Avesani, L., & Torielli, G. B.

- 548 (2014). Functional diversification of grapevine MYB5a and MYB5b in the control of flavonoid  
549 biosynthesis in a petunia anthocyanin regulatory mutant. *Plant and Cell Physiology*, 55(3),  
550 doi: 10.1093/pcp/pct190
- 551 Chaves, M. M., Zarrouk, O., Francisco, R., Costa, J. M., Santos, T., Regalado, A. P., et al.  
552 (2010). Grapevine under deficit irrigation: hints from physiological and molecular data.  
553 *Annals of Botany*, 105(5), 661–676. doi: 10.1093/aob/mcq030
- 554 Chen, Q. J., Deng, B. H., Gao, J., Zhao, Z. Y., Chen, Z. L., Song, S. R., et al. (2020). A mirna-  
555 encoded small peptide, vvi-miPEP171d1, regulates adventitious root formation. *Plant*  
556 *Physiology*, 183(2), 656–670. doi: 10.1104/pp.20.00197
- 557 Conde, A., Pimentel, D., Neves, A., Dinis, L.-T., Bernardo, S., Correia, C. M., et al. (2016). Kaolin  
558 Foliar Application Has a Stimulatory Effect on Phenylpropanoid and Flavonoid Pathways in  
559 Grape Berries. *Frontiers in Plant Science*, 7(August), 1–14.  
560 doi: 10.3389/fpls.2016.01150
- 561 Conn, S., Curtin, C., Bézier, A., Franco, C., & Zhang, W. (2008). Purification, molecular cloning,  
562 and characterization of glutathione S-transferases (GSTs) from pigmented *Vitis vinifera* L.  
563 cell suspension cultures as putative anthocyanin transport proteins. *Journal of Experimental*  
564 *Botany*, 59(13), 3621–3634. doi: 10.1093/jxb/ern217
- 565 Couzigou, J., Laouressgues, D., & Combier, J. (2015). miRNA-encoded peptides (miPEPs): A  
566 new tool to analyze the roles of miRNAs in plant biology, 12(11), 1178–1180.
- 567 Couzigou, J. M., André, O., Guillotin, B., Alexandre, M., & Combier, J. P. (2016). Use of  
568 microRNA-encoded peptide miPEP172c to stimulate nodulation in soybean. *New*  
569 *Phytologist*, 211(2), 379–381. doi: 10.1111/nph.13991
- 570 Dai, X., Zhuang, Z., & Zhao, P. X. (2018). psRNATarget : a plant small RNA target analysis  
571 server ( 2017 release ), 46(April), 7–10. doi: 10.1093/nar/gky316
- 572 Deluc, L. (2006). Characterization of a Grapevine R2R3-MYB Transcription Factor That  
573 Regulates the Phenylpropanoid Pathway. *Plant Physiology*, 140(2), 499–511.  
574 doi: 10.1104/pp.105.067231
- 575 Downey, M. O., Dokoozlian, N. K., & Krstic, M. P. (2006). Cultural practice and environmental  
576 impacts on the flavonoid composition of grapes and wine: A review of recent research.  
577 *American Journal of Enology and Viticulture*, 57(3), 257–268.

- 578 Francisco, R. M., Regalado, A., Ageorges, A., Burla, B. J., Bassin, B., Eisenach, C., Nagy, R., et  
579 al. (2013). ABCC1, an ATP binding cassette protein from grape berry, transports  
580 anthocyanidin 3-O-glucosides. *Plant Cell*, 25(5), 1840–1854. doi: 10.1105/tpc.112.102152
- 581 Gagné, S., Lacampagne, S., Claisse, O., & Gény, L. (2009). Leucoanthocyanidin reductase and  
582 anthocyanidin reductase gene expression and activity in flowers, young berries and skins of  
583 *Vitis vinifera* L. cv. Cabernet-Sauvignon during development. *Plant Physiology and*  
584 *Biochemistry*, 47(4), 282–290. doi: 10.1016/j.plaphy.2008.12.004
- 585 Gomez, C., Terrier, N., Torregrosa, L., Vialet, S., Fournier-level, A., Souquet, J., et al. (2009).  
586 Grapevine MATE-Type Proteins Act as Vacuolar, 150(May), 402–415.  
587 doi: 10.1104/pp.109.135624
- 588 Gould, K. S. (2004). Nature's Swiss Army Knife: The Diverse Protective Roles of Anthocyanins in  
589 Leaves. *Journal of Biomedicine and Biotechnology*, 2004(5), 314–320.  
590 doi: 10.1155/S1110724304406147
- 591 Heppel, S. C. (2010). The Basic Helix-Loop-Helix Transcription Factor MYC1 Is Involved in the  
592 Regulation of the Flavonoid Biosynthesis Pathway in Grapevine, 3(3).  
593 doi: 10.1093/mp/ssp118
- 594 Jiang, S., Chen, M., He, N., Chen, X., Wang, N., Sun, Q., Chen, X., et al. (2019). MdGSTF6,  
595 activated by MdMYB1, plays an essential role in anthocyanin accumulation in apple.  
596 *Horticulture Research*, 6(1). doi: 10.1038/s41438-019-0118-6
- 597 Kozomara, A., & Griffiths-jones, S. (2014). miRBase : annotating high confidence microRNAs  
598 using deep sequencing data, 42(November 2013), 68–73. doi: 10.1093/nar/gkt1181
- 599 Kozomara, A., & Griffiths-Jones, S. (2014). MiRBase: Annotating high confidence microRNAs  
600 using deep sequencing data. *Nucleic Acids Research*, 42(D1), 68–73.  
601 doi: 10.1093/nar/gkt1181
- 602 Laressergues, D., Couzigou, J.-M., Clemente, H. S., Martinez, Y., Dunand, C., Bécard, G., &  
603 Combier, J.-P. (2015). Primary transcripts of microRNAs encode regulatory peptides.  
604 *Nature*, 520, 90–93. doi: 10.1038/nature14346
- 605 Li, P., Chen, B., Zhang, G., Chen, L., Dong, Q., Wen, J., Zhao, J., et al. (2016). Regulation of  
606 anthocyanin and proanthocyanidin biosynthesis by *Medicago truncatula* bHLH transcription  
607 factor MtTT8. *New Phytologist*, 210(3), 905–921. doi: 10.1111/nph.13816

- 608 Liao, L., Vimolmangkang, S., Wei, G., Zhou, H., Korban, S. S., & Han, Y. (2015). Molecular  
609 characterization of genes encoding leucoanthocyanidin reductase involved in  
610 proanthocyanidin biosynthesis in apple. *Frontiers in Plant Science*, 6(APR), 1–11.  
611 doi: 10.3389/fpls.2015.00243
- 612 Matus, J. T., Loyola, R., Vega, A., Peña-Neira, A., Bordeu, E., Arce-Johnson, P., & Alcalde, J. A.  
613 (2009). Post-veraison sunlight exposure induces MYB-mediated transcriptional regulation of  
614 anthocyanin and flavonol synthesis in berry skins of *Vitis vinifera*. *Journal of Experimental*  
615 *Botany*, 60(3), 853–867. doi: 10.1093/jxb/ern336
- 616 Pantaleo, V., Szittyá, G., Moxon, S., Miozzi, L., Moulton, V., Dalmay, T., & Burgyan, J. (2010).  
617 Identification of grapevine microRNAs and their targets using high-throughput sequencing  
618 and degradome analysis. *The Plant Journal : For Cell and Molecular Biology*, 62(6), 960–  
619 976. doi: 10.1111/j.0960-7412.2010.04208.x
- 620 Pérez-Díaz, J. R., Pérez-Díaz, J., Madrid-Espinoza, J., González-Villanueva, E., Moreno, Y., &  
621 Ruiz-Lara, S. (2016). New member of the R2R3-MYB transcription factors family in  
622 grapevine suppresses the anthocyanin accumulation in the flowers of transgenic tobacco.  
623 *Plant Molecular Biology*. doi: 10.1007/s11103-015-0394-y
- 624 Ram, M. K., Mukherjee, K., & Pandey, D. M. (2019). Identification of miRNA, their targets and  
625 miPEPs in peanut (*Arachis hypogaea* L.). *Computational Biology and Chemistry*, 83(July),  
626 107100. doi: 10.1016/j.compbiolchem.2019.107100
- 627 Reid, K. E., Olsson, N., Schlosser, J., Peng, F., & Lund, S. T. (2006). An optimized grapevine  
628 RNA isolation procedure and statistical determination of reference genes for real-time RT-  
629 PCR during berry development. *BMC Plant Biology*, 6, 27. doi: 10.1186/1471-2229-6-27
- 630 Sharma, A., & Kamal Badola, P. (2019). miRNA-encoded peptide, miPEP858, regulates plant  
631 growth and development in *Arabidopsis*. doi: 10.1101/642561
- 632 Teixeira, A., Eiras-Dias, J., Castellarin, S. D., & Gerós, H. (2013). Berry phenolics of grapevine  
633 under challenging environments. *International Journal of Molecular Sciences*, 14(9), 18711–  
634 18739. doi: 10.3390/ijms140918711
- 635 W. Pfaffl, M. (2001). A new mathematical model for relative quantification in real-time RT–PCR.  
636 *Nucleic Acids Research*, 29(9 00). doi: 10.1016/S0043-1354(98)00516-8
- 637 Waterhouse, P. M., & Hellens, R. P. (2015). Plant biology: Coding in non-coding RNAs. *Nature*,

- 638 520(7545), 41–42. doi: 10.1038/nature14378
- 639 Xie, Z., Khanna, K., & Ruan, S. (2010). Expression of microRNAs and its regulation in plants.  
640 *Seminars in Cell and Developmental Biology*, 21(8), 790–797.  
641 doi: 10.1016/j.semcdb.2010.03.012
- 642 Zhang, J., Liu, Y., Bu, Y., Zhang, X., & Yao, Y. (2017). Factor Analysis of MYB Gene Expression  
643 and Flavonoid Affecting Petal Color in Three Crabapple Cultivars, 8(February), 1–9.  
644 doi: 10.3389/fpls.2017.00137
- 645 Zhang, X., Liu, Y., Gao, K., Zhao, L., Liu, L., Wang, Y., Xia, T., et al.(2012). Characterisation of  
646 anthocyanidin reductase from Shuchazao green tea. *Journal of the Science of Food and*  
647 *Agriculture*, 92(7), 1533–1539. doi: 10.1002/jsfa.4739
- 648 Zhang, Y., Butelli, E., Alseekh, S., Tohge, T., Rallapalli, G., Luo, J., Martin, C., et al. (2015). Multi-  
649 level engineering facilitates the production of phenylpropanoid compounds in tomato.  
650 *Nature Communications*, 6, 1–11. doi: 10.1038/ncomms9635
- 651 Zhao, J., & Dixon, R. A. (2010). The “ins” and “outs” of flavonoid transport. *Trends in Plant*  
652 *Science*, 15(2), 72–80. doi: 10.1016/j.tplants.2009.11.006
- 653
